# Supplementary material
Source: publisher site journal article supplement (https://www.dovepress.com/article/375144)
Supplement: Supplementary file 1 [file get_supplementary_file.php]

# Supplementary material

**Supplementary Table 1** Free text participants’ responses from the BECOME study (n=37)

| **Topic** | **Participant Quote** |
| --- | --- |
|  | Changes are happening to me; I have unknown pains...I don't know when my cycle will come or when I will miss it…Everything in my body clock has turned upside down...I never know when I am going to have a hot flash...I don't know what to do. When I am irritable everybody stays away from me…[It] makes you feel upside down.  - Saturn, Indian American woman |
|  | **You feel so crazy** and out of your mind. I could care less what [the HCP] was giving me.  - Elm, White woman |
|  | I didn't know why I was so angry. Everything irritated me. I felt as though I was losing my mind.  - Mercury, Indian American woman |
|  | What is going to happen next to my body? Now I have hair loss and weight gain. I'm like, what’s next? What else will I have to go through before it all ends?  - Wren, Black woman |
|  | Negatives come with the changes that are happening to me: my mood, my sleep, everything changes...Not knowing when my next cycle will be here, it upsets life.  - Saturn, Indian American woman |
|  | I don’t feel as old as my age. Not one bit. Sometimes I have to remind myself of my age. It feels like if a taxi picked me up at 38 and dropped me off at 52 and it was only a ten-minute ride.  - Finch, Black woman |
|  | It all changes. One day everything looks perfect and then hair, skin, everything changes. I used to have clear skin and now I'm back to my teenage skin and I get cystic zits.  - Lily, Filipina American women |
|  | It’s frustrating to feel like you are slacking on your marital intimacy, but the change in hormones have made me feel like I’m asexual.  - Heron, White woman |
|  | [I’m reminded of menopause when] Having to check my chinny chin chin every day for growth, but on the other hand I don’t have to shave my legs as often.  - Kansas, Latina/Hispanic woman |
|  | At work, especially in our afternoon meetings after lunch, I find myself getting tired/drowsy in the meetings, especially in-person meetings. It's embarrassing. I have nodded off and co-workers have called me on it.  - Daisy, Filipina American woman |
|  | Menopause has affected how I interact with people and my temperament...I recall coming home after work, walking into the kitchen and **throwing a Foreman grill** across the kitchen floor. Not sure why I did it, but it felt good...My mood swings are short. **My son knows when they are coming and leaves me alone**.  - Kansas, Latina/Hispanic woman |
|  | [I had a lot of] Burning and itching “down there.” I had to do something; it was driving me crazy...The symptoms made me feel awful, scratching “down there” constantly.  - Wren, Black woman |
|  | Menopause has left me with hot flashes and **embarrassing vaginal dryness**, dry eye, and dry skin. So, that being said, I have **shunned developing any new relationships** with the opposite sex.  - Sparrow, White woman |
|  | I think the older I become, femininity has changed from being attractive and sexy to being **self-assured, classy, distinguished, and confident**.  - Heron, White woman |
|  | To me, being feminine means feeling good about myself and **being able to attract others to me**...**Feeling pretty** and being able to attract others to me involves not just the physical, but my mental outlook as well.  - Ford, Chinese American woman |
|  | My waist is no longer a waist. I feel like a box body. Physically, I don’t feel as attractive as I was before.  - Subaru, Chinese American woman |
|  | It makes me wonder so much about how the world sees women in general, but specifically, **women like me who are perimenopausal and feel adrift and isolated** because of it some days. Somehow, I think most **people see us as irritable women** who are quick to anger…Because that is how so many men see women—**as things to be avoided** during their periods or menopause due to their tempers.  - Tampa, Latina/Hispanic woman |
|  | Now I'm on HRT. It has alleviated the hot flashes, lifted my mood a tiny bit…I just wanted something to get me out of this nightmare I was in. A friend had taken this also, and it changed her life.  - Elm, White woman |
|  | My full-time job requires me to have many meetings…When you're in a meeting and all eyes are on you and you start profusely sweating…I said I can't keep doing this. I spoke to my gynecologist and…I was prescribed HRT.  - Cedar, White woman |
|  | [Perimenopause] is something that affects every single woman, but I feel like this process **is not treated with the reverence, wonder, and care that it deserves**...I don't know why our cultures are like this and other cultures are not. **These life processes are not seen as processes**...we are more than a bunch of parts.  - Volkswagen, Chinese American woman |
|  | I myself had adopted the natural route. I sincerely believe that taking natural stuff and doing things which don’t have any side effects is more beneficial to health.  - Mars, Indian American woman |
|  | Bedside manner counts. Someone who is dismissive is totally a turn-off. I thought at the beginning maybe they're right - my [perimenopause] is not that bad.  - Venus, Latina/Hispanic woman |
|  | Studies show women of color are less likely to get empathy or proper treatment because they think they might be over exaggerating. I wish doctors could be more empathetic and think twice about their racial bias. One of my fears was that I might be misdiagnosed. If they think you're faking or over exaggerating they may not listen as well to you and may think it’s in your head.  - Tampa, Latina/Hispanic woman |
|  | I feel like sometimes things that I would have handled gracefully now turn me into a screaming lunatic…If only there was a magic pill to not deal with these symptoms.  - Heron, White woman |
|  | As far as perimenopause impacting my physical and mental health because of fatigue...my mental health is okay because I know this is a part of life and I embrace it.  - Kingfisher, Black woman |
|  | A lot of online visits mean you have to pay copay and I wouldn't want to reach out all the time.  - Venus, Latina/Hispanic woman, Lower-middle income |
|  | I had so many other pressing health issues at the same time as going through the change. I wasn't paying attention to menopause...I was absorbed in medical specialists taking me in other directions.  - Sparrow, White woman, Low income |
|  | I tried taking **OTC sleep medicine**. This helped for a while, but it stopped. I tried **Advil PM**, which also helped me with my aches and pains...and also helped me sleep. I’m still taking that. Sometimes I use a **cold pack** when I go to bed. I keep extra packs in the freezer so sometimes I can use several.  - Saturn, Indian American woman |
|  | **Waking up drenched** and having to **change clothes, having to flip the pillow over to the dry side.** It's comical. I wish I had a remote-control fan. **I always have fans with me**, they're spread throughout the house.  - Eagle, Black woman |
|  | My usual **bedtime is 8pm**, give or take. I have to start prepping at 7:30pm. I'm eating dinner at least by 6pm**, trying not to eat anything sweet** (if I do, it will be yogurt). **I read**, that seems to help me go to sleep. **I have tried CBD**—sometimes it works, sometimes it doesn't  - Sparrow, White woman |
|  | **Self-care. I called it pampering**. It almost seemed like a luxury, but self-care is essential. If you can't take care of yourself, you can't take care of everyone else. We deserve it—**anything you can do to make yourself feel better.** Think about you.  - Kansas, Latina/Hispanic woman |
|  | If I'm having a bad day, I think, ‘**This is a Netflix day**.’ I bring snacks next to my bed. I feel like my body needs to be rested. It's important to **listen to your body**. When you need to be rested, sometimes...I don’t feel like getting up. **I’m not feeling like not my usual self**, not talking much, and my body feels like it is dragging.  - Finch, Black woman |
|  | **Educating is important. My daughter and my son know**...I’m taking some wild yam root, flax seed powder, and primrose oil…Most are from my husband—he does a lot of research.  - Toucan, Black woman |
|  | It’s like a **‘second sisterhood**’ with my friends. We laugh, we cry about what is happening, but we’re also **much more connected in being older**. We’re a lot more open than when we were 20 or 30 years old.  - Subaru, Chinese American woman |
|  | My supervisor came over to our little group where we were discussing elections. She was like ‘Ugh’ and I am like ‘What’s up?’ She is like ‘Menopause’, and **we broke out laughing**.  - Finch, Black woman |
|  | With family and friends, I am always **making sure I look good** and **no one ever sees any sign** of this phase in my life, such as an **extra strand of hair on my upper lip** or some other thing!”  - Mars, Indian American woman |
|  | Post menopause is when the body has acclimatized to the changes in the body and has **settled firmly into being a crone (wise old woman)**...I am perimenopausal and call myself a **Baby Crone**. Crones are women who are in menopause or post menopause. **The height of women's power and wisdom**  - Eagle, Black woman |
| Interaction with HCP | Women would] **prefer to talk to a woman [HCP]** who might actually know what we're going through.  - Boston, Black woman |
| The reason I stayed with my HCP for so long is that **she has empathy.** She doesn't try to kick you out of the room if you go over time. She really **understands everything** that is happening to me. I had a male gynecologist previously, but it really does matter to have a female one. [The male HCPs] may know everything from the textbook, but **they haven't experienced it**.  - Tulip, Filipina American woman |
| I tried to talk to my doctor about it 5 years ago and got **told how crazy I am** because, according to him, I just needed a man and my periods would magically straighten out. **Am NOT discussing my uterus** or any other part of my reproductive system with any doctor ever again  - Maple, Latina/Hispanic woman |
| [Virtual visits] are convenient...you don't have to lug yourself to the doctor, scramble for parking, wait with everyone hacking and dying. You can go online, turn on your phone or computer…and talk to your doctor about your achy back or hot flashes.  - Sycamore, Black woman |
| I have used [my EMR] a lot. I have checked blood results and imaging…I also use it to message my doctors, and they seem pretty quick to get back to me that way. [I can] renew prescriptions, which saves trips…rather than me having to go in there.  - Owl, White woman |
| Influence of cultural norms | I was raised…with Catholic people and Catholic school, and **we didn’t talk about any of this**, about women, or sexuality…they **make you feel like it’s something that is wrong**. Even my mom sometimes made me feel that my sexuality was wrong, that there’s something wrong with it…I think it’s changing a lot. In my case, I try to…**speak to my son about everything in life,** because I don’t really want him to feel like I felt with my mom.  - Atlanta, Latina/Hispanic woman |
| From the background and culture I come from, we don't talk about such things very openly. It doesn’t permit me to talk about it with friends. Everything is very hush hush. You keep it to yourself or talk to maybe your mom or grandma…I am a very educated and modern woman... although my culture has influenced me not to talk much about it, but I do talk about it with my best girlfriends.  - Mars, Indian American women |
|  | I tend to go to WebMD, these types of sites…They provide almost **a validation of the symptoms I’m having**…They can’t diagnose you, but they can give you an understanding of which symptoms might impede [you]…and **the possibilities of what might help**.  - Pine, White woman |
|  | I'm a big fan of the online groups. **We all share our experiences** and it is such a relief to hear from other women who are **experiencing the same things** as you. I am on B12 thanks to these groups! My doctor NEVER mentioned it.  - Lincoln, Chinese American woman |
|  | **I do track my symptoms.** I have been tracking my period since I was trying to conceive. **I use the app Clue.** I am able to track my symptoms - when I get my period, other symptoms like migraines, cramps, hot flashes, mood, etc.…My migraines are hormonally related, and **it’s helpful to prepare.**  - Heron, White woman |
|  | I use the Apple watch to **monitor my fitness goals.** I wear it daily. It motivates me to move, exercise. When I’m sitting for too long, **it sends me a message to get up and move**. I can see how many calories I’ve burned. I love it.  - Houston, Latina/Hispanic woman |
|  | I feel I can ask more questions online…I feel more open to asking more questions. There’s a sense of anonymity when it’s just your first name…and I also have more time…I don’t have as much time in the office with [doctors], but when I ask a question online, I can just go on and ask.  - Venus, Hispanic/Latina woman |
|  | There are other aspects of menopause that affect women in an intimate sense: issues of intimacy, vaginal dryness, and painful intercourse. I would not necessarily feel comfortable speaking to someone in person, but I had a lot of questions on that and I didn’t want prescription medication. I was trying to find a strategy to cope with this, so I went online…reading articles from the Mayo Clinic as well as reading blogs, etc.  - Ford, Chinese American woman |

**Abbreviations:** CBD,cannabidiol; EMR, electronic medical record; HCP, healthcare practitioner, HRT, hormone replacement therapy; OTC, over-the-counter.

**Supplementary Table 2** Small-group discussion assignments in BECOME

| Group | N | Self-Described Race/Ethnicity |
| --- | --- | --- |
| 1a | 5 | Black |
| 1b | 4 | Black |
| 2a | 4 | Latina |
| 2b | 4 | Latina |
| 3a | 4 | White |
| 3b | 4 | White |
| 4 | 5 | Chinese American |
| 5 | 5 | Indian American (South Asian) |
| 6 | 5 | Filipina American |

## HealthyWomen Survey Questions

HealthyWomen, a leading independent, non-profit health information source for women, is interested in gathering insights on menopause. Please take this short, 15-minute survey to provide your feedback.

1. **Questions**

**Screener** *[Note: Italicized text in brackets is programming language, respondents will not see it.]*

What is your biological gender?

- Female
- Male *[terminate]*
- Non-binary *[terminate]*
- Prefer not to say *[terminate]*

2. Please tell us your age in years. *[ensure numeric response]*

*Age in Years: ________ [terminate if 38 or younger and if 65 or older]*

3. When was your last period?

- Less than 12 months ago
- 12 months–3 years
- 4–5 years
- 6–7 years
- More than 7 years *[terminate]*

4. Do you get your period (menses)?

- Yes
- No

*5. [If Q4=no]* Why do you not get your period?

Menopause

Medication such as birth control, IUDs with hormones, antidepressants, or blood pressure medication caused my period to stop *[terminate]*

Medications such as endocrine therapy or chemotherapy or tamoxifen for breast cancer caused my period to stop

Surgery (hysterectomy with or without ovary removal, endometrial ablation [uterus lining removal])

Lifestyle factors *[terminate]*

- Other medical conditions *[terminate]*
- I do not know

6. Over the last month, did you at least one time think “I’m having a hot flash or a night sweat right now”?

- Yes
- No *[terminate]*

7. Do you consider yourself to be of Hispanic or Latino origin?

- Yes, of Hispanic or Latino origin
- No, not of Hispanic or Latino origin *[🡪 skip to Q9]*

8. Which best describes your race?

- White/Caucasian
- Black/African American
- Asian/Asian American
- American Indian
- Alaska Native
- Native Hawaiian or other Pacific Islander
- Multi-racial
- Other (please specify:________)

***Symptoms & Management***

9.Which of the following have you experienced? For the ones you have experienced, from which have you felt you needed to try to get relief?

| *[Randomize]* | **I have experienced** | **I have NOT experienced** | *[If experienced]* **I have felt the need to try to get relief** | *[If experienced]* **I have NOT felt the need to try to get relief** |
| --- | --- | --- | --- | --- |
| Hot flashes |  |  |  |  |
| Night sweats |  |  |  |  |
| Sleep problems |  |  |  |  |
| Anxiety or panic |  |  |  |  |
| Depression |  |  |  |  |
| Mood changes |  |  |  |  |
| Periods that are not regular (ie, your period is different than it has been either in terms of when it comes, how long it stays or how much you bleed) |  |  |  |  |
| Sexual health challenges (eg, low sex drive, dryness, pain during sex, vaginal atrophy) |  |  |  |  |
| Breast tenderness/pain |  |  |  |  |
| Headaches |  |  |  |  |
| Joint pain |  |  |  |  |
| Exhaustion/fatigue |  |  |  |  |
| Memory challenges |  |  |  |  |

10. How uncomfortable, or not, have each of these symptoms been? *[Only show symptoms indicated as experiencing in Q9]*

| *[Randomize]* | **Mild/they don’t make me uncomfortable** | **Symptoms are uncomfortable, but I’m still able to get through my day** | **Symptoms are uncomfortable, and they negatively impact me** | **Symptoms are extremely uncomfortable and it’s very difficult to function** |
| --- | --- | --- | --- | --- |
| Hot flashes |  |  |  |  |
| Night sweats |  |  |  |  |
| Sleep problems |  |  |  |  |
| Anxiety or panic |  |  |  |  |
| Depression |  |  |  |  |
| Mood changes |  |  |  |  |
| Periods that are not regular (ie, your period is different than it has been either in terms of when it comes, how long it stays or how much you bleed) |  |  |  |  |
| Sexual health challenges (eg, low sex drive, dryness, pain during sex, vaginal atrophy) |  |  |  |  |
| Breast tenderness/pain |  |  |  |  |
| Headaches |  |  |  |  |
| Joint pain |  |  |  |  |
| Exhaustion/fatigue |  |  |  |  |
| Memory challenges |  |  |  |  |

11. *[If Q9=have experienced sleep problems]* Of the following, which do you experience, and do you recognize it as a night sweat?

| *[Randomize]* | I experience and recognize as a night sweat | I experience and do NOT recognize as a night sweat | I do not experience |
| --- | --- | --- | --- |
| Wake up sweaty |  |  |  |
| Feel hot upon waking up |  |  |  |
| Have trouble falling asleep due to reasons other than being warm (eg, anxiety, general insomnia) |  |  |  |
| Have trouble getting back to sleep if I wake up |  |  |  |
| Wake repeatedly during the night to pee |  |  |  |
| Wake repeatedly during the night because I get too hot |  |  |  |
| Wake repeatedly during the night because of dreams |  |  |  |
| Wake repeatedly at night but no idea why |  |  |  |
| Wake repeatedly at night because of noise |  |  |  |
| None of the above |  |  |  |

12. Over the last 10 days, how many hot flashes and/or night sweats have you experienced, on average, each day?

- Less than one a day
- 1–3
- 4–6
- 7–9
- 10+
- Do not know

13. Do you believe you are perimenopausal (having menopause type symptoms but not yet lost your period for 12 consecutive months) or menopausal (have not had your period for 12 consecutive months)?

- Yes, I believe I’m perimenopausal
- Yes, I believe I’m menopausal
- I don’t know
- No, I don’t believe I’m perimenopausal nor menopausal

14. *[If Q9=I have felt the need to try to get relief]* How long after you started experiencing symptoms did you try to get active relief (ie, how long before you recognized and/or accepted you needed help)?

- less than 1 year
- 1–2 years
- 3–5 years
- 5+ years
- I have never tried to get care for my symptoms

15. *[If Q14 NOT=I have never tried to get care for my symptoms]* If you decided to get care, what did you do differently as a result of the care you received? (Select all that apply.) *[Randomize list except for Other]*

- Self-care (yoga, meditation, etc.)
- Changes to diet
- Exercise
- Home remedy
- Family tradition
- Started using a fan
- Started using ice packs
- Over the counter treatments
- Supplements including herbal
- Digital therapeutics such as cooling devices
- Care from a healthcare provider (may have included prescribed medications such as antidepressants, hormone replacement or other) (Think of a healthcare provider as a doctor, nurse, physician assistant, nurse practitioner, someone who provides you medical care)
- Other (please specify): _________________________________________________

16. *[If Q15=care from healthcare provider]* Why did you choose to get care from a healthcare provider (ie, doctor, nurse, physician assistant, nurse practitioner, someone who provides you medical care)? (Select all that apply.)

- I wanted to understand if my symptoms were normal
- I thought a healthcare provider could offer solutions for relief
- I wanted to discuss what medications could help
- Other (please specify): _________________________________________________

17. *[If Q15=over the counter, supplements, digital or care from a healthcare provider]* What medication, over the counter treatment, supplement (herbal or otherwise), digital therapeutic/device did you use?

_________________________________________________________________________

18. *[If Q15=care from healthcare provider]* What best describes the result of the discussion with your healthcare provider?

- My healthcare provider recommended and wrote a prescription
- My healthcare provider discussed prescription options with me, we decided together, and I received a prescription
- I told my healthcare provider what I wanted, and he/she wrote the prescription without question
- My healthcare provider did **NOT** write a prescription
- Other (please specify): _________________________________________________

19. *[If Q18=wrote prescription]* Which of the following do you believe about the medication? (Select all that apply.) *[Randomize options except I am not currently taking and None.]*

- I believe the medication is reducing and/or improving my symptoms
- I don’t think the medication is improving my symptoms
- I have concerns about the medication I am taking
- I am not currently taking medication
- None of the above

20. *[If Q15=care from a healthcare provider and Q18=my healthcare provider did NOT write a prescription]* Why are you not taking a prescription medication for your symptoms? (Select all that apply.) *[Randomize options except Other.]*

- A natural part of life that does not need treatment
- I don’t know of any options to treat my symptoms
- I am afraid to take the medications available because of potential side effects
- My symptoms are not bothersome enough
- I don't have time to go to my healthcare provider
- My healthcare provider does not think I need a prescription medication for the symptoms
- Other (please specify): _________________________________________________

21. *[If Q9=I have NOT felt the need to try to get relief – for every symptom listed]* Why did you not get care? (Select all that apply.) *[Randomize list except for Other.]*

- My symptoms are not that bothersome
- I am not comfortable talking about menopause with my healthcare provider
- I don't want to address it
- Menopause is a natural part of life, so I prefer no medicines
- I am worried about the safety of available medicines
- I could not get to my provider’s office
- I have insurance/cost challenges
- I have concerns with how the medicine is made (eg, sustainable practices, animal cruelty)
- I use non-medical methods for symptom relief (such as home remedies, family traditions, prayer, yoga or lifestyle remedies)
- Uncomfortable going to get care (eg, staying away from medical offices due to COVID-19)
- Other (please specify): _________________________________________________

22. *[If Q9=I have felt the need to try to get relief]* What would have influenced you to try to get care earlier? *[Randomize list except for Other.]*

- Knowing what normal symptoms of menopause are and what are not
- Family and/or friends encouraging me to get care
- More education and awareness about options for symptom relief
- Access to healthcare providers
- Awareness of treatment options
- Awareness that my symptoms are really bad (worse than what would be considered normal)
- Awareness that my symptoms go on longer than what would be considered normal
- Better insurance
- If my symptoms were preventing the things I want to do daily
- Other (please specify): _________________________________________________

***Healthcare providers***

23. From whom do/would you most prefer receiving care for your symptoms that may be perimenopause (having menopause type symptoms but not yet lost your period for 12 consecutive months) or menopause (have not had your period for 12 consecutive months) related?

- A nurse practitioner or physician’s assistant
- A primary care doctor
- An OBGYN
- A non-traditional provider (eg, acupuncture, reflexology, biofeedback, cognitive based therapy, etc.)
- Other (please specify): _________________________________________________

24. Do you prefer to receive care in-person or via telehealth/telemedicine (through a phone call, video conferencing, text, chat and/or healthcare portal with a healthcare provider)?

- In-person
- Telehealth/telemedicine (through a phone call, video conferencing, text, chat and/or healthcare portal with a healthcare provider)

25. *[If Q24=telehealth]* Why do you prefer telehealth/telemedicine (through a phone call, video conferencing, text, chat and/or healthcare portal with a healthcare provider) visits with your health care provider to address symptoms that may be perimenopause (having menopause type symptoms but not yet lost your period for 12 consecutive months) or in menopause (have not had your period for 12 consecutive months) related? Select all that apply. *[Randomize list except for Other.]*

- Avoid potential COVID-19 exposure
- Convenience
- Recorded sessions
- Other (please specify): _________________________________________________

26. Do you feel that you have enough information about managing your symptoms?

- Yes. I’ve researched my symptoms and I feel I have access to information that helps me make good decisions
- No. I feel I don’t have access to the right resources to understand what I’m going through, or I don’t know where to find helpful information to help me make good decisions.
- Not sure. I haven’t really thought about my symptoms, or I haven’t spent any time getting more information on them.

27. Has your experience discussing menopausal symptoms with a healthcare provider been a good one?

- Yes
- No
- I have not discussed menopausal symptoms with a healthcare provider

***Experiences/perceptions of perimenopause/menopause***

28. Who do you talk to about your experiences with perimenopause (having menopause type symptoms but not yet lost your period for 12 consecutive months) or menopause (have not had your period for 12 consecutive months)? Select all that apply. *[Randomize list except for Other.]*

- Friends
- Family (such as mom, sister, aunt, cousins)
- Healthcare provider
- Spouse/significant other
- Children
- Employer/co-workers
- Other (please specify): _________________________________________________

29.Which of the following do you believe when it comes to menopause?

- My symptoms will/are affecting/may affect (change throughout) my relationships with my friends
- My symptoms will/are affecting my social life
- My symptoms will/are affecting my sex life or intimacy with my partner
- My symptoms will/are affecting my relationship with my children
- My symptoms will/are affecting performance at work
- My symptoms will/are affecting my relationships with co-workers
- None of the above

30. What does your immediate family including your partner, if you have one, say about your experience with menopause symptoms? (Select all that apply.) *[Randomize list except for “Other”.]*

- I get mad or yell more easily
- I am not interested in sex
- I seem like a different person
- I do not show weakness
- I am tired all the time
- I seem depressed or anxious
- I am forgetful
- I don’t seem any different
- I am strong
- I stay positive even when experiencing symptoms
- I am coping with my symptoms poorly
- I am coping with my symptoms well
- Other (please specify): _________________________________________________

31. Which of the following describes how **you** view menopause? (Select all that apply.) *[Randomize list except for “None of the above” and “Other’.]*

- It is another phase of life with much to look forward to
- Older women are rarely portrayed in media as attractive
- It is very private and/or embarrassing
- My significant other/partner does not know anything about it
- My immediate family does not know anything about it
- My colleagues do not know anything about it
- As women age they are no longer sexual
- My partner/significant other is supportive
- My friends and I joke about it and support each other
- I feel sexier as I age
- I feel more attractive as I age
- I do/will feel free
- I am/will be in control of my life
- I am/will be living my best life
- I am/will be strong
- None of the above
- Other (please specify): _________________________________________________

32. Which of the following best describes your perceptions about how menopause is viewed **by society**? (Select all that apply.) *[Randomize list except for “None of the above” and “Other’.]*

- It is another phase of life with much to look forward to
- Older women are rarely portrayed in media as attractive
- It is very private and/or embarrassing
- Others do not want to understand/know about it
- As women age they are no longer sexual
- Women are not able to control their emotions
- Women are sexier as they age
- Women are more attractive as they age
- Women feel/will feel free
- Women are/will be in control of their life
- Women are//will be living their best life
- Women are/will be strong
- None of the above
- Other (please specify): _________________________________________________

33. How do you feel about the reproductive/fertility changes menopause will bring? (Select all that apply.)

- I am happy that I will not have my period in the future
- It’s liberating because I no longer have to worry about getting pregnant
- I am sad I can no longer have children
- I am happy about this new chapter in my life
- I am sad about this new chapter in my life
- I do not want to be considered old
- I have no concerns about how old people believe I am
- Other (please specify): _________________________________________________

***Technology***

34. Where do you go to get information about perimenopause (having menopause type symptoms but not yet lost your period for 12 consecutive months) or menopause (have not had your period for 12 consecutive months) symptoms and treatment? (Select all that apply). *[Randomize response options except “Other”.]*

- Use smartphone/device apps to find information
- Engage online community of women with similar experiences
- Engage in-person community outside of family and close friends of women with similar experiences
- Family members and/or close friends
- Healthcare providers
- Google
- Websites such as WebMD
- YouTube
- WhatsApp
- Facebook
- Instagram
- Other (please specify): _________________________________________________

35. Do you currently track your perimenopause (having menopause type symptoms but not yet lost your period for 12 consecutive months) or menopause (have not had your period for 12 consecutive months) symptoms in any of the following ways? (Select all that apply.) *[Randomize responses except “I do not track symptoms and I track my symptoms in a different way”.]*

- I write down my symptoms on paper
- I use symptom trackers on a website
- I use symptom tracking apps for my smartphone/mobile device
- I use smartphone/mobile device apps for health management (eg, yoga/meditation apps, healthy eating/lifestyle, tracking sleep)
- I do not track symptoms
- I track my symptoms in a different way (please specify): ____________

36. Do you currently manage your perimenopause (having menopause type symptoms but not yet lost your period for 12 consecutive months) or menopause (have not had your period for 12 consecutive months) symptoms in any of the following ways or with other technology? (Select all that apply.) *[Randomize responses except “I do not use” and “I manage my symptoms using a different…”]*

- I use a wearable device
- I use a cooling device
- I do not use technology for symptom management
- I manage my symptoms using a different technology (please specify): ____________

37. *[Ask if Q35 NOT=paper or Q35 NOT=I do not track symptoms AND Q36 NOT=I do not use]* Is the way you are currently using technology helping to manage your perimenopause (having menopause type symptoms but not yet lost your period for 12 consecutive months) or menopause (have not had your period for 12 consecutive months) symptoms?

- Yes, a little—up to 25% improvement
- Yes, it has helped my symptoms improve about 26%–50%
- Yes, it does work—51%–75% improvement
- No
- I don’t know

***Demographics***

38. Which of the following do you do/have…? (Select all that apply.) *[Randomize options.]*

- Smoke
- Drink alcohol
- Drink caffeine
- Have a heart condition
- High blood pressure
- High cholesterol
- Have diabetes
- Have or had cancer

39. Do you have a known cancer risk (i.e., been informed by a healthcare provider you have a cancer risk) or has an immediate family member had breast or cervical cancer? (Select all that apply.)

- Yes, a healthcare provider informed me I have an increased risk of cancer
- Yes, an immediate family member has/has had breast cancer
- Yes, an immediate family member has/has had cervical cancer
- No, a healthcare provider hasn’t informed me I have an increased risk of cancer nor has an immediate family member had breast or cervical cancer

40. Do you currently take birth control with hormones (eg, birth control pills; IUDs with hormones such as Mirena, Skyla, Liletta and Kyleena; contraceptive implant; contraceptive injection; vaginal ring)?

- Yes
- No

41. What are the first three digits of your zip code? *[Ensure numeric entries.]*

42. What was your total household income before taxes in 2019?

- Less than $20,000
- $20,000 to $44,999
- $45,000 to $149,999
- $150,000 or more

43. What is the highest degree or level of school you have completed? If currently enrolled, highest degree received.

- Less than high school graduate or equivalent
- High school graduate, diploma or the equivalent (eg, GED)
- Some college credit, no degree
- Trade/technical/vocational training
- Associate degree
- Bachelor’s degree
- Master’s degree
- Doctorate degree

44. Are you currently employed?

- Yes
- No

## BECOME Research Methods

**Part A**

Participants engaged in 3 specific days of activities over a 1-week period using a secure platform. Each activity takes approximately 1 hour to complete. Activities included shared activities, where participants were able to view each other’s responses in a conversation that was managed by a moderator or study investigator to ensure active participation and depth of response.

A secure, online platform (Within3, Lakewood, OH) was used for parts A and B. The platform is encrypted using the Transport Layer Security (TLS) encryption standard. TLS is the industry standard to protect sensitive, personal information as it passes over the web to a server. Participants identified through screening received an invitation to participate via email with instructions to use their pseudonym during the registration process.

**Part B**

Participants were asked to spend at least 10 minutes sharing a symptom, medical encounter, interaction with others, or their own reflections at 10 unique times over a 2-week period on the platform describing moment or triggers that make them think of perimenopause or menopause when they use health technologies. Participants used their pseudonym to protect their identity and were informed that if they were not comfortable sharing in this format, they were not forced to participate.

**Part C**

After completion of Part B, each participant engaged in a 1-hour small-group (≤5 participants), audio-only discussion. A total of 9 groups were formed. The make-up of the groups can be found in Supplementary Table 2. This session was a follow-up on topics discussed in Parts A and B to focus on further exploring healthcare drivers, barriers, and supports for perimenopause and menopause symptoms.

**Part D**

A second small-group discussion was held 3 to 4 weeks after the Part C small-group meeting using a similar format. This follow-up session provided time for further analysis by the study researchers so that discussion and feedback could focus on emerging themes and further explore experiences with health technologies arising from the research completed in Parts A, B, and C. It also provided time for further reflection by participants and an opportunity to share any additional thoughts or issues arising since the last touchpoint.

Group discussions for Parts C and D were conducted using Microsoft Teams (Microsoft, Redmond, WA, US). Participants were instructed to use their pseudonyms during these discussions. All sessions were recorded; participants were aware of the recording. If personal information was mistakenly shared, the information was redacted from the audiofile.

Two-factor authentication was enabled for all compatible systems and devices. Folders where data are stored are encrypted.

## BECOME Study Details

- Women currently experiencing perimenopausal/menopausal symptoms such as irregularity of menses, hot flashes (must have had a night sweat or hot flash within the last month), night sweats (must have had a night sweat or hot flash within the last month), vaginal dryness, low sex drive, mood changes (including feelings of anxiety or depression), sleep disturbances (eg, insomnia), or weight gain.
- Women will be excluded if they experience hot flashes or flushes < 3 times a month, have had surgical menopause, or have worked in or have family who work in advertising, market research, public relations, media, or the US Food and Drug Administration (FDA).
- Patient recruitment was done through a global recruitment company, M3 Global Research (Fort Washington, PA, US).
- Potential participants had previously joined M3 participatory communities and were identified by responding to an email invitation that included a link to a screening questionnaire to determine study eligibility.
- Participants who were successfully enrolled were compensated for their time. Individuals who dropped out at any time were compensated for the completed tasks.
- At enrollment, all participants were given pseudonyms to use during the study as well as research identification numbers and were instructed not to share personal identifying information.

Study personnel reached out to potential participants who responded to questions confirming their eligibility for the study. If enrolled, these responses became part of the study data. Before participation in the study, all participants received study information and a consent form, and signed and electronically returned the consent form to the study coordinator.

## BECOME Screening Questionnaire

Perimenopause: Patient – SCREENER – September 3, 2020

METHOD: Online Discussion, Online Homework Entries, and Small Group Discussions

MARKET: USA

SAMPLE: Perimenopause and menopause

**Respondent’s Name**: ______________________________

## INCLUDE FIRST NAME ONLY ON PROFILE SHEET + LAST INITIAL IF DUPLICATE NAME.

Home Number: _____________________ Alternate Number: _____________

Respondent’s Mailing Address: _________________________________________

Email address: _________________________________________________

## *Star best contact number for confirmation

| **FOR RECRUITERS ONLY** | |
| --- | --- |
| **USA: N=40 PATIENTS**  **Recruited based on the following ethnic backgrounds**   - **Group 1: 9 Black women** - **Group 2: 8 Latina women** - **Group 3: 8 White women** - **Group 4: 5 Chinese American** - **Group 5: 5 Indian American (South Asian)** - **Group 6: 5 Filipino American**   **Fieldwork:**   - **All women recruited need to participate in all methods.** - **Method 1: PT Online Discussion: October 22, 23, 26 (1 hr each day X 3 days)** - **Method 2: PT Online Homework: October 27-November 5 (10 mins/day X 10 days)** - **Method 3: Virtual Small Group Discussion (1 hr; each group maximum 5 people):**   1. **Group 1:**       - **Nov.9 at 8pm EST or**      - **Nov.12 at 4pm EST**   2. **Group 2:**       - **Nov.9 at 4pm EST or**      - **Nov.11 at 8pm EST**   3. **Group 3:**      - **Nov.9 at 2pm EST or**      - **Nov.12 at 5:30pm EST**   4. **Group 4:**      - **Nov.11 at 6pm EST**   5. **Group 5:**      - **Nov.10 at 5pm EST**   6. **Group 6**      - **Nov.10 at 6:30pm EST** - **Method 4: Virtual Small Group Discussion (1 hr; each group maximum 5 people):**   1. **Group 1:**       - **Dec.14 at 8pm EST or**      - **Dec.15 at 4pm EST**   2. **Group 2:**       - **Dec.14 at 4pm EST or**      - **Dec.15 at 8pm EST**   3. **Group 3:**      - **Dec.14 at 2pm EST or**      - **Dec.17 at 5:30pm EST**   4. **Group 4:**      - **Dec.15 at 6pm EST**   5. **Group 5:**      - **Dec.17 at 4pm EST**   6. **Group 6**      - **Dec.16 at 6:30pm EST** | **NOTE ON QUOTAS:**   - **Each group needs to have the following mix within the group:**   - **60% to have experienced at least 1 year of perimenopause symptoms, including vasomotor symptoms (VMS), but not yet menopausal (experienced amenorrhea for 12 consecutive months).**   - **40% to be experiencing menopausal symptoms, including VMS, and be 5-7 years postmenopause (experienced amenorrhea for 12 consecutive months).**   - **40% to have tried pharmacotherapy in the last 6 months.**   - **30% who have not yet tried pharmacotherapy but have used other home or over the counter therapies to manage symptoms.**   - **20% to be health technology “super-users” (using more than one health technology more than once a week).**   - **Aim for a mix of income levels**   - **Aim for a mix of types of health insurance** |
|  |  |

**INTRODUCTION**

Hello, my name is [NAME] and I’m calling from [COMPANY] an independent market research firm. We are conducting a research study on behalf of a major pharmaceutical company, with **women who are experiencing perimenopause or menopausal symptoms**, to understand their experiences of with these symptoms.

Through this study we hope to understand women’s thoughts about and experiences with perimenopause and menopause. Your responses will only be collected for research purposes and not shared with others outside of the study.

If you are a good fit for the research, we would like to invite you to participate in the following activities:

- **Online Discussion:** You and other participants will be asked to participate in 3 specific ‘days’ of online activities where you answer questions on perimenopause, menopause, and health technology by typing in answers and uploading pictures. Each of the 3 daily activities will take about 1 hour to finish.  You will do this on a secure web platform we will help you access.
- **Online Homework Assignments:** After the Online Discussion is finished, you will be asked to spend at least 10 minutes a day writing reflections on your perimenopause, menopause or health technology experiences on 10 different days. You will do this on a secure web platform we will help you access.
- **Small Group Meeting:** After the online homework assignment is finished, you will be asked to be part of a 1-hour discussion (voice-only, no video) in a small group of 3-4 other participants to discuss perimenopause, menopause and health technology. This will take place on a secure web platform we will help you access.
- **Follow Up Small Group Meeting:** Three to four weeks after the first Small Group Meeting, you will be asked to join a follow-up (1-hour) discussion (voice-only, no video) in a small group of 3-4 participants to discuss perimenopause, menopause and health technology. This will take place on a secure web platform we will help you access.

If you are interested in participating, I would like to ask you a few questions to see if you fit in the group of respondents we are looking for before we confirm your participation. Would that be ok?

| A | Yes | **CONTINUE** |
| --- | --- | --- |
| B | No | **THANK & TERMINATE** |

**Adverse Event Reporting - USA**

Before we begin, we are required to tell the company sponsoring this study about any adverse events that are reported about any products they make (e.g., unwanted change of health, side effects during treatment, lack of effectiveness, etc.) so that they can report this to the FDA. We ask for only the minimum amount of information needed to meet the FDA’s reporting requirements.

If you do mention a drug-related adverse event, we will ask if we can give your name and contact information to the company sponsoring this research who would use it only for the purpose of meeting their duties to the FDA; no information that personally identifies you will be asked for or reported if disclosed. You also have the right to “opt out” of sharing your contact information with no negative impact for you.

Do you agree to go ahead with the study based on this?

| A | Yes, I’d like to go ahead with the study | **CONTINUE** |
| --- | --- | --- |
| B | No, thank you | **THANK & TERMINATE** |

Great! The following questions will determine if you are a good fit for our study.

1. Do you identify as a woman?:

| A | YES | **CONTINUE** |
| --- | --- | --- |
| B | NO | **THANK & TERMINATE** |

1. How old were you on your last birthday? **______ RECORD [SEE NOTE BELOW]**

| **NOTE FOR RECRUITER:**  **Must be between 40-65** |
| --- |

1. Have you or any member of your family ever worked in any of these areas? **[READ LIST]**

| A | Advertising | **THANK AND TERMINATE** |
| --- | --- | --- |
| B | Marketing / Market Research | **THANK AND TERMINATE** |
| C | Public Relations | **THANK AND TERMINATE** |
| D | FDA | **THANK AND TERMINATE** |
| E | Any Media (Print, Radio, TV, etc.) | **THANK AND TERMINATE** |
| F | Healthcare, Pharmaceutical, Biotechnology, or Medical Device Company | **THANK AND TERMINATE** |
| G | None of the above **[MUTUALLY EXCLUSIVE]** | **CONTINUE** |

4A) Which of the following statements fits you best?

| A | I experience a regular menstrual period | **CONTINUE TO Q5A** |
| --- | --- | --- |
| B | I experience a regular menstrual period, but sometimes I miss a month or two | **CONTINUE TO Q5A** |
| C | I no longer have a menstrual period, but it has not yet been 12 months since my last menstrual period | **CONTINUE TO Q5A** |
| D | It has been more than 12 months since my last menstrual period | **CONTINUE TO Q4B** |
| E | I had a hysterectomy or other procedure that stopped my menstrual period | **THANK AND TERMINATE** |

4B). **[FOR WOMEN WHO SELECTED D FOR QUESTION 4A]**

How many years has it been since you stopped your menstrual period?

**______ RECORD [SEE NOTE BELOW]**

**[NOTE FOR RECRUITER: RECRUIT 40% OF EACH GROUP WHO ANSWER 6-8 YEARS TO Q4B AND EXPERIENCE CURRENT SYMPTOMS OF PERIMENOPAUSE/MENOPAUSE IN Q5A; RECRUIT 60% OF EACH GROUP WHO ANSWER A, B OR C TO Q4A AND EXPERIENCE CURRENT SYMPTOMS OF PERIMENOPAUSE/MENOPAUSE IN Q5A].**

5A) Please check all the symptoms of perimenopause/menopause that you currently have.

| A | Hot flashes or flushes* | **RECORD [GO TO Q5B]** |
| --- | --- | --- |
| B | Vaginal dryness | **RECORD [GO TO Q5E]** |
| C | Feeling hot then cold | **RECORD [GO TO Q5E]** |
| D | Night sweats* | **RECORD [GO TO Q5E]** |
| - E | - Periods that aren’t regular | **RECORD [GO TO Q5E]** |
| - F | - Sleep problems | **RECORD [GO TO Q5E]** |
| - G | - Mood changes | **RECORD [GO TO Q5E]** |
| - H | - Weight gain and slowed metabolism | **RECORD [GO TO Q5E]** |
| - I | - Thinning hair | **RECORD [GO TO Q5E]** |
| - J | - Dry skin | **RECORD [GO TO Q5E]** |
| - K | - Loss of breast fullness | **RECORD [GO TO Q5E]** |
| - L | - All of the above | **RECORD [GO TO Q5E]** |
| - M | - None of the above | **THANK AND TERMINATE** |

**[NOTE FOR RECRUITERS: MUST INCLUDE EITHER A: HOT FLASHES OR FLUSHES OR D: NIGHT SWEATS IN RESPONSE TO Q5A TO CONTINUE.]**

5B) **[FOR RESPONDENTS EXPERIENCING A: HOT FLASHES IN Q5A]:**

How often do you have hot flashes or flushes?

| A | Less than once per month | **THANK AND TERMINATE** |
| --- | --- | --- |
| B | 1–2 times per month | **THANK AND TERMINATE** |
| C | 3–4 times per month | **RECORD AND CONTINUE** |
| D | Once per week | **RECORD AND CONTINUE** |
| E | 1–2 times per week | **RECORD AND CONTINUE** |
| F | 3–4 times per week | **RECORD AND CONTINUE** |
| G | 1–5 times per day | **RECORD AND CONTINUE** |
| - H | - 6 – 20 times per day | **RECORD AND CONTINUE** |
| - I | - 21 or more times a day | **HOLD** |

5C) **[FOR RESPONDENTS EXPERIENCING A: HOT FLASHES IN Q5A]:**

How long do your hot flashes or flushes usually last?

| A | Up to 1 minute | **RECORD AND CONTINUE** |
| --- | --- | --- |
| B | 1–2 minutes | **RECORD AND CONTINUE** |
| C | 3–5 minutes | **RECORD AND CONTINUE** |
| D | 6–10 minutes | **RECORD AND CONTINUE** |
| - E | - More than 10 minutes | **HOLD** |
| - F | - Unsure | **HOLD** |

5D) **[FOR RESPONDENTS EXPERIENCING A: HOT FLASHES IN Q5A]:**

When you get a hot flash or flush, what usually happens?

| A | Flushing of face or neck | **RECORD AND CONTINUE** |
| --- | --- | --- |
| B | Sweating or perspiration | **RECORD AND CONTINUE** |
| C | Feeling hot then chilly | **RECORD AND CONTINUE** |
| D | Waking up soaked in sweat | **RECORD AND CONTINUE** |
| - E | - Joints start to ache | **THANK AND TERMINATE** |
| - F | - Not able to pee | **THANK AND TERMINATE** |
| - G | - None of the above | **THANK AND TERMINATE** |
| - H | - All of the above | **THANK AND TERMINATE** |

5E)How long ago did you first begin to feel the symptoms of menopause?

| A | Less than 12 months ago | **THANK AND TERMINATE** |
| --- | --- | --- |
| B | 12 months ago | **RECORD AND CONTINUE** |
| C | 1–2 years ago | **RECORD AND CONTINUE** |
| D | 3–5 years ago | **RECORD AND CONTINUE** |
| E | 6–7 years ago | **RECORD AND CONTINUE** |
| F | More than 7 years ago | **THANK AND TERMINATE** |

6A) Do you take any medications for your perimenopause/menopause that were prescribed by your doctor?

| A | YES | **RECORD AND CONTINUE TO Q6B** |
| --- | --- | --- |
| B | NO | **RECORD AND CONTINUE TO Q7A** |

**[NOTE FOR RECRUITERS: RECRUIT 40% OF EACH GROUP THAT ANSWER A: YES TO Q6A]**

6B) What kind of prescription medications are you taking for your perimenopause/menopause symptoms?

**RECORD TREATMENT(s): ___________________________________________**

**[FIRST ASK UNAIDED THEN REVIEW THE FOLLOWING LIST WITH PARTICIPANT]**

| Estrogen products, which may include generic or branded Premarin, Duavee,  Activella, Vagifem, Climara, and Cenestin | **RECORD AND CONTINUE** |
| --- | --- |
| Bioidentical or compounded estrogens | **RECORD AND CONTINUE** |
| SSRIs like Brisdelle | **RECORD AND CONTINUE** |
| Seizure medications like gabapentin | **RECORD AND CONTINUE** |
| Other: specify | **RECORD AND HOLD** |

**[RECRUIT A MIX OF TREATMENTS]**

7A). Do you take any other treatments that aren’t prescribed by a doctor for your perimenopause/menopause symptoms? This can include home remedies, supplements, over the counter treatments, alternative medicine, herbal remedies, or other activities.

| A | YES | **RECORD AND CONTINUE TO Q7B** |
| --- | --- | --- |
| B | NO | **RECORD AND CONTINUE TO Q8** |

**[NOTE TO RECRUITERS: RECRUIT 30% OF EACH GROUP THAT ANSWER B: NO TO Q6A AND A: YES TO Q7A]**

7B). What do you take or use to help with your perimenopause/menopause symptoms?

**RECORD TREATMENT(s): ___________________________________________**

**[FIRST ASK UNAIDED THEN REVIEW THE FOLLOWING LIST WITH PARTICIPANT]**

| Black Cohash | **RECORD AND CONTINUE** |
| --- | --- |
| Red Clover | **RECORD AND CONTINUE** |
| Kava | **RECORD AND CONTINUE** |
| Ginseng | **RECORD AND CONTINUE** |
| Evening Primrose Oil | **RECORD AND CONTINUE** |
| Dong Quai | **RECORD AND CONTINUE** |
| Calcium | **RECORD AND CONTINUE** |
| Vitamin D | **RECORD AND CONTINUE** |
| Exercise | **RECORD AND CONTINUE** |
| Yoga | **RECORD AND CONTINUE** |
| Other: specify | **RECORD AND HOLD** |

**[RECRUIT A MIX OF TREATMENTS]**

8A). Which of the following types of health technologies do you use to help with your perimenopause/menopause symptoms and/or other parts of your health?

| Digital health devices you wear, such as the Fit Bit, Embr Bracelet, Cooling Pebal Device, or the Ladycare Magnet | **CONTINUE** |
| --- | --- |
| Digital apps to manage your health, such as the MenoPro app (apps you use on your phone or computer) | **CONTINUE** |
| Digital apps to track health symptoms, such as the Clue app or Menopause View app (apps you use on your phone or computer) | **CONTINUE** |
| Virtual or online doctor’s visits | **CONTINUE** |
| Health websites with health information | **CONTINUE** |
| Online health discussion forums (where people can chat about their health concerns online) | **CONTINUE** |
| Electronic medical records (your doctor shares your health records with you online) | **CONTINUE** |
| Other: specify | **RECORD AND HOLD** |

**RECORD # OF HEALTH TECHNOLOGIES USED: ___________________________________**

8B). How often do you use health technologies to help with perimenopause/menopause symptoms and/or other aspects of your health?

| A | Never | **RECORD AND CONTINUE** |
| --- | --- | --- |
| B | Once a month | **RECORD AND CONTINUE** |
| C | A couple times a month | **RECORD AND CONTINUE** |
| D | Once a week | **RECORD AND CONTINUE** |
| E | More than once a week | **RECORD AND CONTINUE** |

**[NOTE TO RECRUITERS: RECRUIT 20% OF EACH GROUP THAT DESCRIBE USING 2 OR MORE HEALTH TECHNOLOGIES IN Q8A AND ANSWER E: MORE THAN ONCE A WEEK TO Q8B]**

9. Which of the following best describes your race or ethnicity?

| A | White or Caucasian | **RECORD AND CONTINUE** |
| --- | --- | --- |
| B | Black or African American | **RECORD AND CONTINUE** |
| C | Latina or Hispanic | **RECORD AND CONTINUE** |
| D | Chinese American | **RECORD AND CONTINUE** |
| E | Indian American (South Asian descent) | **RECORD AND CONTINUE** |
| F | Filipino American | **RECORD AND CONTINUE** |
| G | Other: specify | **RECORD AND HOLD** |

**[NOTE TO RECRUITERS: RECRUIT THE FOLLOWING QUOTAS FOR EACH ETHNIC BACKGROUND:]**

- **Group 1: 9 Black women**
- **Group 2: 8 Latina women**
- **Group 3: 8 White women**
- **Group 4: 5 Chinese American**
- **Group 5: 5 Indian American (South Asian descent)**
- **Group 6: 5 Filipino American**

10. What is your current health insurance status? Please select only one. **[RECORD ONLY]**

| A | Employer Sponsored Insurance Plan | **RECORD AND CONTINUE** |
| --- | --- | --- |
| B | Medicaid | **RECORD AND CONTINUE** |
| C | Medicare | **RECORD AND CONTINUE** |
| D | VA (Veteran’s Administration) | **RECORD AND CONTINUE** |
| E | Do not have health insurance | **RECORD AND CONTINUE** |
| F | Other (Specify):__________ | **RECORD AND HOLD** |

**[RECRUIT A MIX OF HEALTH INSURANCE STATUS]**

11. How much total combined money did all members of your household earn last year (2019)?

| A | $0–$4999 | **RECORD AND CONTINUE** |
| --- | --- | --- |
| B | $5000–$9,999 | **RECORD AND CONTINUE** |
| C | $10,000–$24,999 | **RECORD AND CONTINUE** |
| D | $25,000–$49,999 | **RECORD AND CONTINUE** |
| E | $50,000–$74,999 | **RECORD AND CONTINUE** |
| F | $75,000–$99,999 | **RECORD AND CONTINUE** |
| G | $100,000–$149,999 | **RECORD AND CONTINUE** |
| H | $150,000 or more | **RECORD AND CONTINUE** |

**[RECRUIT A MIX OF INCOME LEVELS]**

12. What is the highest level of education you have completed?

| A | Less than high school degree | **RECORD AND CONTINUE** |
| --- | --- | --- |
| B | High school degree or equivalent (eg, GED) | **RECORD AND CONTINUE** |
| C | Some college but no degree | **RECORD AND CONTINUE** |
| D | Associate degree | **RECORD AND CONTINUE** |
| E | Bachelor’s degree | **RECORD AND CONTINUE** |
| F | Graduate degree | **RECORD AND CONTINUE** |

**[RECORD ONLY]**

13. What is your current relationship status?

| A | Married | **RECORD AND CONTINUE** |
| --- | --- | --- |
| B | Common law (living with a partner) | **RECORD AND CONTINUE** |
| C | Widowed | **RECORD AND CONTINUE** |
| D | Divorced | **RECORD AND CONTINUE** |
| E | Separated | **RECORD AND CONTINUE** |
| F | Never married | **RECORD AND CONTINUE** |
| G | Other (specify):__________ | **RECORD AND CONTINUE** |

**[RECORD ONLY]**

14. Do you have daily access to a laptop/computer with internet?

| A | Yes | **CONTINUE** |
| --- | --- | --- |
| B | No | **THANK AND TERMINATE** |

15. **[Articulation Question]** In this research study, we will ask you to spend time thinking and talking about your personal experiences and to share your thoughts and feelings. To prepare for this, I would like you to spend a quick moment, thinking about this question:

Imagine that you have the money to go anywhere in the world, with anyone, for a week’s vacation. Who would you take, where would you go, and why?

__________________________________________________________________

Because…_________________________________________________________

| **LOOK FOR ARTICULATE AND CREATIVE ANSWERS. IT IS CRUCIAL THAT RESPONDENTS ARE PARTICIPATORY AND WILLING TO ENGAGE.** | |
| --- | --- |
| **IDEAL PARTICIPANT:**  **[ ]** puts thought into their response  **[ ]** can think abstractly (gives a creative response)  **[ ]** appreciates detail/is thorough | **TERMINATE FOR:**  **[ ]** Difficulty expressing thoughts/ideas  **[ ]** Cannot/will not elaborate on response/add details when prompted |

**INVITATION – RESEARCH PARTICIPATION**

We are pleased to invite you to participate in this study; your profile fits perfectly the type of participant we are looking for. We would like to invite you to participate in the **online discussion, online homework, and two small group discussions.** These **activities** will be facilitated by an experienced professional moderator.

These will take place on ___XXX__ (date/time) ____XX____. For your participation in the research you will be paid $__XX____.

Are you interested in participating in the research activities?

YES [ ] NO [ ] **TERMINATE**

***Please note that the small group discussions will be recorded so that the researcher can review the discussion to make sure they have all of your important comments.***

The personal information you share will be kept confidential and will be disclosed only to those who are directly working on the research that is relevant to the topic of discussion.

Representatives of our client may be listening into the interview but will not have access to any

of your private information. **You will be asked to sign a consent form in order to participate**

**in this research**. Are you willing to do this?

YES [ ] NO [ ] **TERMINATE**

Great. If I could ask you to grab a pen and paper I’ll give you the details. We will call you to remind you one day in advance. Please honor the commitment to participate in this research. Your opinion is very IMPORTANT to the success of this research. We understand that you are very busy and that sometimes things do come up, so if for some reason you find you can’t participate, please call us as soon as possible so we have time to find a replacement for you.

**[GIVE PHONE NUMBER]**

If I could now just take down your remaining details…

**[RECORD INFORMATION ON FRONT PAGE].**

Thank you for participating

## BECOME Group Requirements

Self-reported race and/or ethnicity, obtained from information completed by participants during screening, was used to cluster women into groups. Each group met all of the following:

- 60% to have experienced at least 1 year of perimenopause symptoms, including vasomotor symptoms (VMS), but not yet menopausal (experienced amenorrhea for 12 consecutive months)
- 40% experienced menopausal symptoms, including VMS, and will be 5–7 years post menopause (experienced amenorrhea for 12 consecutive months)
- 40% tried pharmacotherapy in the last 6 months
- 30% who have not yet tried pharmacotherapy but have used other home or over the counter therapies to manage symptoms
- 20% were health technology “super-users” (using more than one health technology more than once a week)

Within each group women will represent a range of socioeconomic backgrounds and insurance coverage.

The funding sponsor and participants were blinded during the study. The research team were only informed of research categories for each participant.

## NODE.Health Screening Questionnaire

**Thank you for your interest in taking the survey. Please answer the questions below to see if you qualify for our study. If you qualify, you will be asked to verify your identity.**

1. What is your biological gender? (M/F/binary/prefer not to say)
(*Note: only F meets inclusion criteria*)

2. How old are you? (input age)

3. Have you experienced a complete cessation of periods for the last 12 months continuously? (yes/no)

4. Symptomatology (Click all that apply)

o Irregularity of menses

o Hot flashes *(if either hot flashes or night sweats not selected, terminate survey)*

o Night sweats *(if either hot flashes or night sweats not selected, terminate survey)*

o Vaginal dryness

o Low sex drive

o Mood changes, including feelings of anxiety or depression

o Sleep disturbance (eg, insomnia)

o Weight gain

Your name:

Your email address:NODE.Health Survey Part 1

The first part of the survey will ask general demographic questions.

The study sample demographics will include questions to identify the participant cohort such as:

A. General demographic Information

1. Age

2. Ethnic/cultural background

3. Age of onset of perimenopausal symptoms

4. Duration of perimenopausal symptoms (based on months)

## NODE.Health Survey Part 2

1) Would you like to use a smartphone app to manage or track your symptoms?

a. Yes

b. No

2) Are you currently satisfied with online information sources that describe menopause related symptoms?

a. Yes

b. No

3) How do you prefer to receive healthcare information related to menopausal symptoms? (Select all that apply)

a. In-person with professional healthcare provider

b. Telehealth/telephone/virtual care with professional healthcare provider

c. Email or secure message with professional healthcare provider

d. Discussion with friends and/or family

e. Self-treatment after independent research

f. Web searches and/or social media group posts

g. Other [free text response option]

4) How comfortable are you in using live video/telehealth services to discuss menopausal symptoms and receive care?

a. Likert Scale: 0 (not comfortable at all); 5 (very comfortable)

5) What type of technology are you comfortable using to receive medical care/advice? (Select all that apply)

a. Websites

b. Mobile phone apps

c. Phone calls with professional healthcare providers

d. Emails with professional healthcare providers

e. None, only in-person

6) How do you consume information related to menopause, and what role does technology play in helping you access educational resources, if any?

7) How are you currently tracking your menopausal symptoms? (Select all that apply)

a. Not tracking them at all

b. My healthcare provider tracks them

c. Tracking them on paper

d. Tracking them using a digital health tool (ie, mobile phone app, healthcare software, non-phone tracking gadget, etc)

7b. (only asked if response to 7 is b, c, or d). How often do you track your menopausal related symptoms?

a. Daily

b. Weekly

c. Monthly

d. Annually

e. Never

8) What type of technology are you interested in using to receive care related to menopausal symptoms?

(Select all that apply)

a. Live telehealth consultations

b. App based services for treatments

c. Online messaging services (ie, instant messages, online chat, text messages, etc)

d. Other (free text)

e. I am not interested in technology to receive care related to perimenopausal symptoms

8b. (only asked if response to 8 is a, b, c, or d). Please indicate which devices you own or have recently used to receive care.

9) What are the main drivers that encourage you to explore digital health technologies?

## NODE.Health Survey Healthcare Practitioners’ Experience Survey

1) How do women experiencing perimenopausal symptoms discuss their experience of going through this transition with you? (Examples may include, but are not limited to websites, apps, video visits, etc.)

2) How do you select the recommended treatment for women with perimenopausal symptoms?

3) How are treatment decisions made in your practice?

a. Based on your recommendation

b. Jointly with the patient

c. Based on the patient’s request (if not prohibitive)

4) What types of data do you specifically track for perimenopausal women? (Select all that apply)

a. Menstrual cycle (ie, longer or shorter, heavier or lighter, regularity, etc.)

b. Symptoms (ie, night sweats, hot flashes, etc.)

c. Labs (ie, FSH levels, CBC, etc.)

d. Risk of associated diseases (ie, heart disease, stroke, etc.)

e. Treatment used (ie, hormonal therapy, complementary and alternative medicine, etc.)

f. None
